# Supplementary material
Source: publisher site journal article supplement (https://static.cambridge.org/content/id/urn:cambridge.org:id:article:S0016756818000869/resource/name/S0016756818000869supp001.xls)
Supplement: Supplementary file 1 [file S0016756818000869supp001.xls]

## Sheet: 14BB08-2
Supplementary Table 1 U-Pb isotopic compositions of zircons from the granotoids in the Bengbu area
	Ratio									Age
Analysis	Th/U	common 206Pb		207Pb/206Pb	207Pb/206Pb	207Pb/235U	207Pb/235U	206Pb/238U	206Pb/238U	207Pb/206Pb	207Pb/206Pb	207Pb/235U	207Pb/235U	206Pb/238U	206Pb/238U
		%	1sigma	Ratio	1sigma	Ratio	1sigma	Ratio	1sigma	Age (Ma)	1sigma	Age (Ma)	1sigma	Age (Ma)	1sigma	Concordance(%)
14BB08-2-01	0.548614			0.112935	0.00289378	5.16948	0.136188	0.329534	0.00493541	1847.22	41.6675	1847.61	22.4176	1836.12	23.9301	99.399
14BB08-2-02	0.372505			0.1495	0.00230643	8.0598	0.123997	0.387943	0.00516441	2340.44	26.545	2237.75	13.8979	2113.28	23.9867	90.2941
14BB08-2-03	0.475839			0.113657	0.0019074	4.93599	0.0842817	0.312131	0.00382834	1858.95	30.2475	1808.43	14.4178	1751.19	18.8085	94.203
14BB08-2-05	0.383822			0.112487	0.00265727	5.05587	0.112355	0.324163	0.00461755	1839.82	42.5925	1828.73	18.8406	1810.03	22.4797	98.381
14BB08-2-06	0.756998			0.133093	0.0033821	6.98115	0.165144	0.378182	0.00549965	2139.2	44.445	2109.03	21.0131	2067.79	25.7246	96.6619
14BB08-2-07	0.0675196	0.17	0.03	0.11202	0.00203	4.78758	0.07209	0.30998	0.00312	1832	34	1783	13	1741	15	95.0328
14BB08-2-08	0.594994			0.135887	0.00188458	7.57845	0.105984	0.401583	0.00389962	2175.62	24.385	2182.32	12.5454	2176.32	17.9359	100.032
14BB08-2-09	0.343872			0.114493	0.00162731	5.35551	0.0804967	0.337176	0.00380982	1872.22	26.08	1877.77	12.8612	1873.07	18.3669	100.045
14BB08-2-10	0.475793			0.112082	0.00129321	5.12227	0.0581373	0.32946	0.00270481	1835.19	20.53	1839.81	9.6424	1835.76	13.1153	100.031
14BB08-2-11	0.125963			0.112971	0.00196433	5.08824	0.0834633	0.325661	0.0030819	1847.84	31.4825	1834.15	13.9207	1817.32	14.9867	98.3483
14BB08-2-12	1.10662			0.13474	0.00347793	7.4183	0.202895	0.397601	0.00633768	2160.8	44.29	2163.18	24.4772	2157.98	29.2326	99.8697
14BB08-2-13	0.849962			0.168078	0.0034074	10.5768	0.201278	0.454341	0.00497841	2538.58	33.18	2486.68	17.6555	2414.52	22.067	95.1132
14BB08-2-14	0.0508814			0.112427	0.00201309	5.14011	0.0881632	0.330014	0.00306076	1839.2	32.8725	1842.76	14.5805	1838.45	14.8352	99.9591
14BB08-2-15	0.346909			0.135996	0.00154701	6.67479	0.0848691	0.353074	0.00268436	2176.86	20.525	2069.29	11.2287	1949.26	12.789	89.5448
14BB08-2-16	0.513783			0.111912	0.00291416	4.84144	0.12005	0.312323	0.00379214	1831.48	46.76	1792.13	20.8706	1752.13	18.6279	95.667
14BB08-2-17	0.639933			0.112377	0.0027002	5.14131	0.123712	0.330335	0.00399156	1838.89	43.3625	1842.96	20.4569	1840	19.342	100.061
14BB08-2-18	0.52079			0.112452	0.0025344	5.11375	0.104399	0.329085	0.00364082	1839.2	41.05	1838.39	17.3404	1833.95	17.659	99.7143
14BB08-2-20	0.476193			0.111816	0.00228448	5.04692	0.101488	0.325964	0.00340402	1829.32	37.04	1827.23	17.0432	1818.79	16.5493	99.4242
14BB08-2-22	0.374335			0.167333	0.00259097	10.0664	0.152469	0.434088	0.00349167	2531.17	26.235	2440.89	13.9905	2324.12	15.6956	91.8199
14BB08-2-23	0.568581			0.151073	0.00247246	9.24299	0.161267	0.441121	0.00591138	2358.34	27.775	2362.38	15.9877	2355.66	26.4429	99.8864
14BB08-2-24	0.453951			0.131849	0.00172684	7.1308	0.0896909	0.390283	0.00323581	2124.07	23.3	2127.9	11.2011	2124.14	15.0037	100.003
14BB08-2-25	0.575219			0.15102	0.00303805	9.64833	0.188294	0.462699	0.00739456	2357.72	33.7925	2401.79	17.9568	2451.46	32.5896	103.976
14BB08-2-26	0.240108			0.135029	0.00209952	6.8551	0.106163	0.366107	0.00338934	2164.5	27.165	2092.87	13.7239	2011.06	15.9937	92.9109
14BB08-2-27	0.136768			0.112292	0.00172004	5.10411	0.0740729	0.329823	0.00258471	1836.73	27.78	1836.79	12.3222	1837.52	12.5296	100.043
14BB08-2-28	0.0128811			0.112442	0.00184717	5.12432	0.0854691	0.330207	0.00340346	1839.2	29.94	1840.15	14.1713	1839.39	16.4938	100.01
14BB08-2-29	0.0371386			0.111297	0.00159893	5.02613	0.0804686	0.326361	0.00257997	1820.68	26.2375	1823.73	13.5595	1820.72	12.5393	100.002
14BB08-2-30	0.624067			0.113852	0.00296506	5.26036	0.133607	0.335015	0.00409182	1862.04	47.6875	1862.45	21.6734	1862.64	19.7583	100.032
14BB08-2-32	0.023701			0.113847	0.00148314	5.26509	0.068829	0.33439	0.00242972	1861.42	22.995	1863.22	11.1556	1859.63	11.738	99.9034
14BB08-2-33	0.441638			0.169485	0.00202635	10.4051	0.135396	0.442533	0.00362305	2553.7	20.0625	2471.5	12.0547	2361.97	16.1908	92.492
14BB08-2-34	1.47203			0.132537	0.00270786	7.17308	0.135799	0.392141	0.00346809	2131.79	36.5725	2133.16	16.8726	2132.75	16.0593	100.045
14BB08-2-35	1.04213			0.1325	0.00186909	7.41499	0.100662	0.404873	0.00371126	2131.17	30.0925	2162.78	12.1469	2191.44	17.0296	102.828
14BB08-2-36	0.485765			0.131813	0.00219576	6.50654	0.099394	0.356907	0.00413177	2124.07	28.2375	2046.78	13.4455	1967.49	19.6293	92.6285
14BB08-2-37	0.546099			0.150007	0.00193307	8.75212	0.116638	0.421525	0.00382369	2345.99	21.9125	2312.52	12.1448	2267.4	17.3399	96.6499
Concordance=206Pb/238U age/207Pb/206Pb age*100%.
Sample in red color has been corrected for common Pb.

## Sheet: 14BB35-1
	Ratio									Age
Analysis	Th/U	common 206Pb		207Pb/206Pb	207Pb/206Pb	207Pb/235U	207Pb/235U	206Pb/238U	206Pb/238U	207Pb/206Pb	207Pb/206Pb	207Pb/235U	207Pb/235U	206Pb/238U	206Pb/238U
		%	1sigma	Ratio	1sigma	Ratio	1sigma	Ratio	1sigma	Age (Ma)	1sigma	Age (Ma)	1sigma	Age (Ma)	1sigma	Concordance(%)
14BB35-1-01	0.191185			0.190477	0.0018041	13.9987	0.133626	0.53097	0.0027192	2745.99	15.7375	2749.62	9.04648	2745.54	11.4497	99.9835
14BB35-1-02	0.39284			0.198513	0.00207582	15.0328	0.161456	0.547562	0.00414346	2813.89	16.51	2817.32	10.2257	2815.03	17.2597	100.041
14BB35-1-03	0.369652			0.197373	0.00240593	14.9184	0.179088	0.545488	0.00358156	2804.63	20.06	2810.05	11.424	2806.38	14.9391	100.062
14BB35-1-04	0.453086			0.202044	0.00203289	15.523	0.157258	0.554297	0.00339444	2842.9	15.5825	2847.9	9.66417	2843.02	14.0784	100.004
14BB35-1-05	0.545737			0.197002	0.00250814	14.5011	0.176599	0.531572	0.00470598	2801.54	20.6775	2783.08	11.5684	2748.07	19.8076	98.0914
14BB35-1-06	0.171741			0.186293	0.0017043	13.5	0.122535	0.52254	0.00261598	2709.57	15.1275	2715.29	8.58084	2709.94	11.076	100.014
14BB35-1-07	0.627053			0.191464	0.00209381	14.1504	0.151646	0.53306	0.00402195	2754.64	17.9	2759.84	10.1637	2754.33	16.9121	99.9889
14BB35-1-08	0.172498			0.185361	0.00190217	13.3858	0.134145	0.520687	0.0029417	2701.54	16.975	2707.25	9.46853	2702.09	12.4703	100.021
14BB35-1-09	0.552797			0.203295	0.00207066	15.7097	0.152796	0.556805	0.00294652	2852.77	16.665	2859.31	9.28503	2853.41	12.2009	100.022
14BB35-1-10	0.245596			0.198261	0.00243846	16.1065	0.199149	0.58533	0.00447653	2812.96	20.0625	2883.14	11.8213	2970.46	18.2029	105.599
14BB35-1-11	0.299353			0.188064	0.00336383	13.9515	0.238226	0.535568	0.00717887	2725.01	29.6325	2746.42	16.1797	2764.87	30.1376	101.463
14BB35-1-12	0.277782			0.186607	0.0031927	14.1298	0.242931	0.546086	0.00510545	2712.65	28.09	2758.46	16.3049	2808.87	21.2873	103.547
14BB35-1-13	0.445676			0.165306	0.00408811	11.2098	0.24711	0.490895	0.00731128	2510.8	41.67	2540.73	20.5528	2574.55	31.6132	102.539
14BB35-1-14	0.584734			0.203206	0.00250069	15.6731	0.186822	0.556913	0.00451273	2853.7	20.06	2857.08	11.3779	2853.86	18.6851	100.006
14BB35-1-15	0.336423			0.185251	0.00273524	13.2909	0.190265	0.520603	0.00461882	2701.85	24.385	2700.54	13.5193	2701.74	19.581	99.9959
14BB35-1-16	0.663022			0.198592	0.00256589	15.0475	0.214299	0.547206	0.00589381	2814.5	20.5225	2818.25	13.5603	2813.54	24.5566	99.966
14BB35-1-17	0.721707			0.20175	0.00234565	15.4507	0.175557	0.553516	0.0044747	2840.43	18.8225	2843.45	10.8362	2839.78	18.5681	99.9771
14BB35-1-18	0.220087			0.185367	0.00307221	13.3465	0.20747	0.520523	0.00486191	2701.54	27.47	2704.48	14.6849	2701.4	20.6127	99.9947
14BB35-1-19	0.220456			0.199331	0.00204772	15.1623	0.169085	0.548854	0.00352809	2820.68	16.665	2825.49	10.623	2820.41	14.6841	99.9903
14BB35-1-20	0.221247			0.203646	0.00245941	15.5663	0.18983	0.552356	0.00399652	2857.4	19.445	2850.56	11.6356	2834.96	16.5963	99.2147
14BB35-1-21	0.230278			0.191982	0.00213046	14.0418	0.157733	0.528361	0.00300953	2758.95	17.435	2752.53	10.648	2734.54	12.6938	99.1154
14BB35-1-22	0.192348			0.18944	0.00194085	13.8905	0.142932	0.529322	0.00260799	2738.89	16.975	2742.27	9.74681	2738.6	10.9932	99.9891
14BB35-1-23	0.370919			0.19795	0.0018694	14.9822	0.152898	0.546185	0.00319848	2809.57	15.43	2814.11	9.71421	2809.29	13.3353	99.9899
14BB35-1-24	0.305128			0.16819	0.00376047	11.728	0.261188	0.504764	0.00701114	2539.81	37.6575	2582.93	20.8394	2634.24	30.036	103.718
14BB35-1-25	0.160256			0.203776	0.00315662	15.8652	0.237212	0.562781	0.00728541	2856.48	26.08	2868.71	14.2825	2878.11	30.0523	100.757
14BB35-1-26	0.590001			0.203702	0.00199689	15.7545	0.156646	0.557607	0.0030519	2857.4	16.05	2862.03	9.49356	2856.73	12.6308	99.9766
14BB35-1-27	0.301618			0.203969	0.0021651	15.8062	0.16245	0.558643	0.00332094	2858.32	16.51	2865.16	9.81504	2861.02	13.7351	100.094
14BB35-1-28	0.401231			0.197813	0.00228008	15.003	0.167893	0.546565	0.00374836	2809.26	18.055	2815.43	10.6531	2810.87	15.624	100.057
14BB35-1-29	0.178881			0.18566	0.00202535	13.418	0.154641	0.521192	0.00412262	2705.55	17.44	2709.53	10.891	2704.23	17.4706	99.9512
14BB35-1-30	0.309112			0.185388	0.00249486	13.9076	0.208814	0.540524	0.00515687	2701.54	22.225	2743.43	14.2237	2785.64	21.5793	103.113
14BB35-1-31	0.246221			0.189675	0.00178604	13.922	0.134204	0.529333	0.00292106	2739.2	15.4325	2744.41	9.13228	2738.64	12.3128	99.9794
14BB35-1-32	0.33004			0.197374	0.00164847	14.9249	0.127228	0.545099	0.00265419	2804.63	13.58	2810.46	8.11234	2804.76	11.0737	100.004
14BB35-1-33	0.382227	0.3	0.06	0.18449	0.00253	12.3016	0.14032	0.4836	0.00366	2694	23	2628	11	2543	16	94.395
14BB35-1-34	0.343059			0.191976	0.00173452	14.2988	0.131242	0.537509	0.00307948	2758.95	14.815	2769.74	8.71077	2773.01	12.9116	100.51
14BB35-1-35	0.514128			0.202099	0.00254522	15.6518	0.19195	0.55911	0.00446277	2843.52	15.74	2855.78	11.7051	2862.95	18.4521	100.684
14BB35-1-36	0.243944			0.198781	0.00184397	15.1043	0.151154	0.547894	0.00319994	2816.36	15.1225	2821.84	9.5306	2816.41	13.3266	100.002
14BB35-1-37	0.596389			0.203121	0.00241445	15.947	0.187429	0.567829	0.00525785	2851.54	20.2125	2873.63	11.2303	2898.9	21.6187	101.661
14BB35-1-38	0.522512			0.19731	0.00272083	15.1583	0.231938	0.555679	0.00679805	2805.55	23.3025	2825.24	14.5759	2848.75	28.1699	101.54
14BB35-1-39	0.490068			0.204248	0.0017917	15.7281	0.143169	0.555875	0.00328458	2860.18	14.97	2860.42	8.6905	2849.56	13.6089	99.6287
14BB35-1-40	0.369126			0.190138	0.00270106	14.3207	0.19081	0.543816	0.00566917	2743.52	23.145	2771.19	12.6467	2799.4	23.6725	102.037
14BB35-1-41	0.605913			0.198037	0.00216641	14.9612	0.176628	0.546765	0.00552324	2810.18	17.9025	2812.77	11.2368	2811.7	23.0192	100.054
14BB35-1-42	0.178127			0.191907	0.00435349	14.4385	0.274749	0.549866	0.0108033	2758.34	37.3425	2778.97	18.072	2824.61	44.9352	102.403
14BB35-1-43	0.341735			0.209976	0.00306177	16.5126	0.223403	0.569494	0.00628922	2905.25	22.685	2906.96	12.9537	2905.74	25.832	100.017
14BB35-1-44	0.137272			0.200503	0.00375142	15.8788	0.30302	0.572831	0.00913222	2831.48	30.5525	2869.53	18.2309	2919.43	37.4298	103.106
14BB35-1-45	0.580984			0.19866	0.00246804	15.0613	0.185782	0.547511	0.00445748	2816.66	20.37	2819.12	11.7455	2814.81	18.5684	99.9343
14BB35-1-46	0.588679			0.19949	0.00310576	15.4404	0.235094	0.559176	0.00754234	2821.91	24.5325	2842.81	14.5207	2863.22	31.184	101.464
14BB35-1-47	0.267959			0.185572	0.00222669	13.3721	0.154257	0.520963	0.00332336	2703.39	20.2175	2706.29	10.8986	2703.26	14.0857	99.9953
14BB35-1-48	0.368554			0.186662	0.00325065	13.461	0.221806	0.523543	0.00599375	2713.27	29.17	2712.55	15.5755	2714.19	25.3609	100.034
14BB35-1-49	0.981015			0.203065	0.00263655	16.7317	0.215483	0.594678	0.00433472	2850.92	20.215	2919.59	12.34	3008.36	17.5229	105.522
14BB35-1-50	0.606332			0.199902	0.00312675	15.2534	0.260392	0.55062	0.00632572	2825.61	25.615	2831.19	16.2687	2827.75	26.2981	100.076
14BB35-1-51	0.378536			0.196971	0.0025074	15.0078	0.1971	0.549819	0.00419948	2801.54	20.6775	2815.74	12.5028	2824.42	17.4676	100.817
14BB35-1-52	0.379745			0.198721	0.00405887	15.5805	0.296225	0.567687	0.0086137	2815.74	33.33	2851.43	18.1426	2898.31	35.4204	102.933
14BB35-1-53	0.353496			0.166152	0.00367133	11.0153	0.248395	0.480949	0.00729178	2520.37	41.6675	2524.43	20.9942	2531.4	31.7406	100.437
14BB35-1-54	0.217952			0.168484	0.00319459	11.2542	0.198449	0.484045	0.00570144	2542.9	31.485	2544.42	16.4449	2544.86	24.7661	100.077
14BB35-1-55	0.315535			0.164295	0.00354727	10.5845	0.209019	0.46786	0.00476054	2501.85	35.6475	2487.35	18.3225	2474.17	20.907	98.8936
14BB35-1-56	0.79119			0.198572	0.00242439	15.0681	0.183886	0.547851	0.00402076	2814.5	20.06	2819.55	11.6207	2816.23	16.7455	100.062
14BB35-1-57	0.574039			0.191763	0.00229451	14.1445	0.170699	0.534102	0.00485669	2757.1	18.98	2759.44	11.4452	2758.71	20.4083	100.058
14BB35-1-58	0.654336			0.211558	0.00340583	16.8069	0.305648	0.573441	0.00654793	2917.59	26.2325	2923.88	17.4303	2921.93	26.8271	100.149
14BB35-1-59	0.295535			0.185244	0.00308436	13.3241	0.230361	0.521644	0.00576388	2701.85	27.4725	2702.9	16.3308	2706.15	24.4187	100.159
14BB35-1-60	0.0763868			0.197734	0.00389505	14.7828	0.303604	0.543524	0.0116523	2809.26	32.0925	2801.36	19.5348	2798.18	48.6657	99.6057

## Sheet: 14BB37-1
	Ratio									Age
Analysis	Th/U	common 206Pb		207Pb/206Pb	207Pb/206Pb	207Pb/235U	207Pb/235U	206Pb/238U	206Pb/238U	207Pb/206Pb	207Pb/206Pb	207Pb/235U	207Pb/235U	206Pb/238U	206Pb/238U
		%	1sigma	Ratio	1sigma	Ratio	1sigma	Ratio	1sigma	Age (Ma)	1sigma	Age (Ma)	1sigma	Age (Ma)	1sigma	Concordance(%)
14BB37-1-01	0.814926			0.132322	0.00398695	7.42849	0.256836	0.404255	0.00688351	2128.7	52.3175	2164.41	30.9507	2188.6	31.5999	102.814
14BB37-1-02	1.52288			0.134602	0.00254953	7.429	0.138251	0.398366	0.00392039	2158.95	33.0275	2164.47	16.6556	2161.51	18.0729	100.119
14BB37-1-03	0.662			0.134574	0.00311086	7.37029	0.180111	0.397234	0.0055346	2158.33	40.435	2157.37	21.8523	2156.29	25.5351	99.9055
14BB37-1-04	0.662534			0.131809	0.00285199	7.0849	0.15065	0.389854	0.00532	2121.91	38.735	2122.15	18.9224	2122.15	24.6753	100.011
14BB37-1-05	0.549941			0.131599	0.00227678	7.06579	0.129878	0.387061	0.00464449	2120.37	30.7075	2119.75	16.3515	2109.18	21.5855	99.4724
14BB37-1-06	0.902703			0.134505	0.00189944	7.43376	0.105473	0.398986	0.00284828	2157.72	25.1575	2165.04	12.6991	2164.37	13.1247	100.308
14BB37-1-07	0.722665			0.134448	0.00334602	8.37384	0.183211	0.453687	0.00721468	2157.1	43.52	2272.35	19.8481	2411.63	31.9939	111.799
14BB37-1-08	0.679226			0.134737	0.00350952	7.71253	0.24495	0.411877	0.00707546	2160.8	45.3725	2198.06	28.5547	2223.5	32.3058	102.902
14BB37-1-09	1.20101			0.132165	0.00186215	7.15996	0.0982231	0.39108	0.00269279	2127.78	24.69	2131.53	12.223	2127.84	12.4787	100.003
14BB37-1-10	0.982082			0.135179	0.00255325	7.44055	0.140277	0.399619	0.00348646	2166.35	33.0275	2165.86	16.8766	2167.29	16.0581	100.043
14BB37-1-11	1.11455			0.133696	0.00267465	7.28572	0.138918	0.395376	0.00422057	2147.22	30.5575	2147.06	17.0254	2147.71	19.4984	100.023
14BB37-1-12	1.23104			0.131821	0.0021882	7.25267	0.123418	0.396951	0.00460459	2124.07	28.2375	2143	15.1861	2154.99	21.2486	101.456
14BB37-1-13	0.894653			0.132167	0.00230925	7.13949	0.123476	0.389682	0.00439295	2127.78	30.555	2128.98	15.4045	2121.35	20.3779	99.6981
14BB37-1-14	1.05788			0.132117	0.00248404	7.14623	0.133683	0.391194	0.00448886	2127.78	32.2525	2129.82	16.6643	2128.36	20.8002	100.028
14BB37-1-15	1.40979			0.134454	0.00168169	7.39909	0.0937458	0.39775	0.00295033	2157.1	27.01	2160.86	11.3336	2158.67	13.6069	100.073
14BB37-1-16	0.737007			0.131906	0.00166143	7.12959	0.091398	0.390156	0.00280675	2124.07	22.22	2127.75	11.4161	2123.55	13.0154	99.9757
14BB37-1-17	0.908686			0.132022	0.00298309	7.3158	0.163717	0.400685	0.00436288	2124.99	39.97	2150.74	19.9929	2172.19	20.0795	102.221
14BB37-1-18	0.577975			0.131736	0.00221849	8.22893	0.142683	0.451457	0.00409669	2121.3	29.32	2256.53	15.6995	2401.73	18.1948	113.22
14BB37-1-19	0.843977			0.1321	0.00233033	7.02767	0.120462	0.383824	0.00468962	2127.78	35.955	2114.94	15.2379	2094.12	21.8463	98.4184
14BB37-1-20	0.3814			0.131531	0.00203004	7.10115	0.0987314	0.38981	0.00332904	2118.21	27.62	2124.19	12.3754	2121.95	15.4413	100.176
14BB37-1-21	0.555688			0.132101	0.00269784	7.22885	0.142877	0.397175	0.00563898	2127.78	30.71	2140.07	17.6318	2156.02	26.0178	101.327
14BB37-1-22	0.901259			0.131579	0.00190516	7.12922	0.101685	0.391906	0.00427029	2120.37	24.8425	2127.7	12.7017	2131.66	19.7773	100.533
14BB37-1-23	0.734161			0.131629	0.00414419	7.1805	0.197262	0.395459	0.00670097	2120.37	54.48	2134.08	24.4894	2148.1	30.9558	101.308
14BB37-1-24	0.522432			0.131929	0.0017291	7.27744	0.0961982	0.398504	0.00273871	2123.76	22.375	2146.05	11.801	2162.15	12.6241	101.808
14BB37-1-25	0.687308			0.131784	0.00443387	7.34556	0.255519	0.402422	0.00658769	2121.91	59.265	2154.37	31.098	2180.18	30.2814	102.746
14BB37-1-26	0.517295			0.13176	0.00187535	7.12002	0.104389	0.390518	0.00330716	2121.3	23.915	2126.55	13.0543	2125.23	15.332	100.185
14BB37-1-27	0.68975			0.131539	0.00172389	6.91234	0.0912863	0.380636	0.00312469	2120.37	23.61	2100.24	11.7152	2079.25	14.5897	98.0608
14BB37-1-28	0.775753			0.131609	0.00258386	7.03773	0.138237	0.387256	0.00408811	2120.37	34.26	2116.21	17.4647	2110.09	18.997	99.5152
14BB37-1-29	0.55247			0.131721	0.0014762	7.1126	0.08413	0.38948	0.00313261	2121.3	19.29	2125.62	10.5302	2120.42	14.5336	99.9586
14BB37-1-30	1.28772			0.131832	0.00226877	7.18861	0.124704	0.394534	0.00340052	2124.07	30.71	2135.09	15.4644	2143.82	15.7194	100.93
14BB37-1-32	0.954222			0.132624	0.00235707	6.82978	0.111052	0.372662	0.00319659	2133.02	31.635	2089.59	14.4024	2041.91	15.0122	95.7288
14BB37-1-33	0.632122			0.134171	0.00199023	7.37631	0.108826	0.396609	0.0032681	2153.39	30.5575	2158.1	13.1928	2153.41	15.0848	100.001
14BB37-1-35	0.967503			0.132397	0.00157799	7.29725	0.0857195	0.397807	0.00251792	2131.48	20.985	2148.47	10.4904	2158.93	11.6122	101.288
14BB37-1-36	0.626351			0.134739	0.00139395	7.63866	0.078449	0.409017	0.00242317	2160.8	23.305	2189.42	9.2211	2210.43	11.0863	102.297
14BB37-1-37	0.864503			0.131762	0.00200829	7.07444	0.10323	0.389612	0.003298	2121.3	26.5375	2120.83	12.9821	2121.03	15.2995	99.9874
14BB37-1-38	0.500709			0.131779	0.00211926	7.09229	0.111745	0.389976	0.00388808	2121.91	27.6225	2123.08	14.0221	2122.72	18.0322	100.038
14BB37-1-39	0.702217			0.13212	0.00184095	7.15367	0.105459	0.391439	0.00424785	2127.78	24.3825	2130.75	13.1336	2129.5	19.68	100.081
14BB37-1-40	0.597257			0.132249	0.00354269	7.2939	0.183849	0.401272	0.00666046	2128.09	47.69	2148.06	22.5114	2174.89	30.641	102.2
14BB37-1-41	0.595772			0.132155	0.00157437	7.15659	0.0841497	0.391002	0.00252104	2127.78	20.6775	2131.11	10.4758	2127.48	11.6834	99.9859
14BB37-1-42	0.644086			0.131671	0.00169645	7.10347	0.097036	0.38939	0.00337051	2120.68	22.375	2124.48	12.1594	2120	15.6384	99.9678
14BB37-1-43	1.0161			0.132635	0.00237622	7.15759	0.124644	0.39224	0.00351618	2133.02	31.635	2131.24	15.5158	2133.21	16.2808	100.009
14BB37-1-44	0.763285			0.132874	0.0021124	7.21512	0.109686	0.393021	0.00365848	2136.11	27.775	2138.37	13.5579	2136.82	16.9302	100.034
14BB37-1-45	0.663798			0.131594	0.00136564	7.12579	0.0822768	0.390947	0.00299726	2120.37	18.5175	2127.27	10.2815	2127.22	13.891	100.323
14BB37-1-46	1.01214			0.134562	0.00372967	7.36632	0.217507	0.395633	0.0064662	2158.33	48.455	2156.89	26.4038	2148.9	29.8675	99.5632
14BB37-1-47	0.922637			0.134582	0.00159839	7.41914	0.0880574	0.397805	0.00245423	2158.33	20.2175	2163.28	10.6205	2158.92	11.3185	100.027
14BB37-1-48	0.703586			0.132137	0.00189168	7.14866	0.106842	0.390977	0.00333554	2127.78	24.845	2130.12	13.314	2127.36	15.4584	99.9803
14BB37-1-49	0.542532			0.131728	0.00185604	7.113	0.103268	0.390071	0.00362185	2121.3	25.15	2125.67	12.9253	2123.16	16.7963	100.088
14BB37-1-50	0.739242			0.134286	0.00246866	7.40118	0.14929	0.39699	0.00429261	2154.62	31.33	2161.11	18.0454	2155.16	19.8083	100.025
14BB37-1-51	1.22923			0.132772	0.00150852	7.21424	0.0840266	0.392469	0.00317136	2134.87	18.98	2138.26	10.3871	2134.27	14.6818	99.9719
14BB37-1-52	0.764079			0.131811	0.00164319	7.11709	0.0896273	0.390027	0.00281332	2124.07	21.14	2126.18	11.2121	2122.95	13.0471	99.9473
14BB37-1-53	0.497604			0.131616	0.00157905	7.10877	0.0852006	0.389296	0.002391	2120.37	20.985	2125.14	10.6692	2119.56	11.0944	99.9619
14BB37-1-54	0.946907			0.132947	0.00217325	7.23541	0.114782	0.393275	0.00317284	2138.89	28.2375	2140.88	14.153	2138	14.6801	99.9586
14BB37-1-55	0.944188			0.132795	0.0017562	7.21038	0.0946987	0.392686	0.00280348	2135.49	18.055	2137.79	11.712	2135.27	12.9767	99.9898
14BB37-1-56	0.898028			0.132117	0.00168108	7.15463	0.0940374	0.390612	0.00293495	2127.78	22.22	2130.87	11.7097	2125.66	13.6055	99.9008
14BB37-1-57	0.661977			0.132584	0.00186024	6.95386	0.099434	0.378713	0.00330569	2132.41	28.7025	2105.56	12.6943	2070.27	15.4564	97.086
14BB37-1-58	0.603839	0.9	0.13	0.12548	0.00259	6.53196	0.12099	0.37755	0.00343	2036	37	2050	16	2065	16	101.424
14BB37-1-59	0.912186			0.131988	0.00303869	7.00814	0.171486	0.382698	0.00385327	2124.38	40.43	2112.46	21.7467	2088.87	17.9648	98.3286

## Sheet: 14BB40-1
	Ratio									Age
Analysis	Th/U	common 206Pb		207Pb/206Pb	207Pb/206Pb	207Pb/235U	207Pb/235U	206Pb/238U	206Pb/238U	207Pb/206Pb	207Pb/206Pb	207Pb/235U	207Pb/235U	206Pb/238U	206Pb/238U
		%	1sigma	Ratio	1sigma	Ratio	1sigma	Ratio	1sigma	Age (Ma)	1sigma	Age (Ma)	1sigma	Age (Ma)	1sigma	Concordance(%)
14BB40-1-01	0.226698			0.16913	0.00209696	11.3229	0.153096	0.484867	0.00491317	2549.99	20.6775	2550.09	12.6155	2548.43	21.3301	99.9387
14BB40-1-02	0.452651			0.168882	0.00263045	11.5194	0.196066	0.493248	0.00601852	2546.6	26.235	2566.16	15.9032	2584.71	25.9823	101.497
14BB40-1-03	0.603868			0.194088	0.00207103	14.4418	0.158784	0.538143	0.00408985	2776.86	16.8175	2779.18	10.4413	2775.67	17.1407	99.9574
14BB40-1-04	0.616604			0.192427	0.00190204	14.2548	0.148341	0.535652	0.00354638	2764.82	16.355	2766.81	9.87411	2765.22	14.8872	100.015
14BB40-1-05	0.405765			0.16955	0.0016317	11.4149	0.114573	0.486079	0.0029384	2553.39	16.36	2557.64	9.3709	2553.69	12.7464	100.012
14BB40-1-06	0.623127			0.193522	0.00203504	14.3973	0.165892	0.537528	0.0046089	2772.53	17.745	2776.26	10.9403	2773.09	19.3238	100.02
14BB40-1-07	0.652219			0.191752	0.00202682	14.1656	0.157115	0.533652	0.00391027	2757.1	18.055	2760.85	10.5197	2756.82	16.4361	99.9899
14BB40-1-08	0.529854			0.147778	0.00153024	8.86116	0.0917617	0.433193	0.00268578	2320.07	18.06	2323.81	9.44878	2320.09	12.0805	100.001
14BB40-1-09	0.370198			0.195188	0.00198012	14.8597	0.153005	0.549303	0.00365366	2786.11	16.665	2806.3	9.7961	2822.27	15.2024	101.298
14BB40-1-10	0.801175			0.14994	0.00148332	9.10907	0.0902125	0.438937	0.00256032	2346.3	16.975	2349.02	9.06144	2345.88	11.4702	99.9821
14BB40-1-11	0.282525			0.168955	0.00198266	11.4842	0.14016	0.491194	0.00517757	2547.22	20.5225	2563.29	11.4002	2575.84	22.3827	101.124
14BB40-1-12	0.347368			0.169968	0.00157616	11.4564	0.107926	0.486937	0.0027663	2557.1	14.97	2561.03	8.79784	2557.41	11.9929	100.012
14BB40-1-13	1.66399			0.189283	0.00178151	13.6903	0.132253	0.522142	0.00310404	2736.11	15.74	2728.52	9.1415	2708.26	13.1459	98.9818
14BB40-1-14	0.707462			0.17014	0.00160041	11.5164	0.112303	0.488758	0.00302339	2558.95	16.515	2565.92	9.11069	2565.3	13.0915	100.248
14BB40-1-15	1.05854			0.189272	0.00173494	13.8732	0.137189	0.528477	0.00317418	2736.11	15.1225	2741.09	9.36603	2735.03	13.3873	99.9604
14BB40-1-16	1.11606			0.165672	0.0017149	10.9437	0.116369	0.476884	0.00321649	2514.5	16.82	2518.36	9.89333	2513.68	14.0396	99.9674
14BB40-1-17	0.494641			0.209892	0.00205504	16.5464	0.163459	0.569211	0.0033113	2904.63	16.05	2908.92	9.45943	2904.58	13.6031	99.9983
14BB40-1-18	0.504616	0.27	0.12	0.14651	0.00292	8.5591	0.14118	0.42371	0.00475	2306	35	2292	15	2277	22	98.7424
14BB40-1-19	0.811059			0.165655	0.00138035	10.9581	0.0964998	0.477254	0.002604	2514.5	13.1175	2519.58	8.19415	2515.3	11.3633	100.032
14BB40-1-20	0.536707			0.165348	0.00138266	10.9136	0.0956226	0.476675	0.00318681	2510.8	13.4225	2515.79	8.15	2512.77	13.912	100.078
14BB40-1-21	0.577354			0.189733	0.00150738	13.9105	0.113065	0.529341	0.00288121	2739.82	12.5	2743.63	7.69968	2738.67	12.1448	99.9581
14BB40-1-22	1.41661			0.190088	0.00253566	12.487	0.177502	0.474244	0.00581581	2742.91	21.9125	2641.75	13.3643	2502.15	25.4309	91.2223
14BB40-1-23	0.79625			0.135711	0.00121172	7.53469	0.0685115	0.400846	0.00205773	2173.15	15.4325	2177.12	8.15108	2172.93	9.46927	99.99
14BB40-1-24	0.738782			0.135562	0.00147238	7.51805	0.08135	0.400677	0.00270432	2172.22	18.52	2175.14	9.69752	2172.16	12.4463	99.9969
14BB40-1-25	0.949278			0.191096	0.00243927	14.3736	0.208757	0.542632	0.00591672	2751.55	20.52	2774.69	13.7887	2794.46	24.7251	101.559
14BB40-1-26	0.734886			0.189033	0.00263092	12.9571	0.175569	0.494854	0.00500357	2744.45	22.8425	2676.54	12.7733	2591.64	21.5775	94.4322
14BB40-1-27	0.620788			0.191128	0.00288198	14.2746	0.228053	0.538859	0.00582623	2753.71	24.69	2768.13	15.161	2778.67	24.4067	100.906
14BB40-1-28	0.922233			0.164706	0.0014066	10.8691	0.127925	0.474846	0.00387621	2505.55	15.2775	2512	10.9442	2504.78	16.9426	99.969
14BB40-1-29	1.21777			0.164942	0.00150721	10.8636	0.102341	0.475604	0.00283993	2507.1	16.2025	2511.52	8.7594	2508.09	12.4067	100.039
14BB40-1-30	0.763675			0.193361	0.00286957	14.4633	0.202236	0.540061	0.00538266	2772.22	24.38	2780.6	13.2804	2783.7	22.5309	100.414
14BB40-1-33	0.934498			0.184775	0.00329792	12.9612	0.239404	0.505703	0.00764184	2695.99	29.63	2676.83	17.4133	2638.26	32.7175	97.8587
14BB40-1-34	0.817132			0.136007	0.00189085	7.80756	0.111332	0.413127	0.00333871	2176.86	28.705	2209.08	12.8356	2229.2	15.2306	102.405
14BB40-1-35	0.406453			0.20517	0.00289852	15.7727	0.220432	0.552487	0.00351372	2867.59	17.44	2863.13	13.3453	2835.51	14.5901	98.8814
14BB40-1-36	0.837435			0.135629	0.00275	6.51596	0.150453	0.344887	0.00424674	2171.91	35.4975	2048.06	20.3285	1910.14	20.3558	87.9472
14BB40-1-37	0.47047			0.310528	0.00538824	31.4609	0.540652	0.728993	0.00750797	3523.77	26.08	3533.57	16.9133	3529.67	27.993	100.167
14BB40-1-38	0.806525			0.169343	0.00391269	11.5623	0.283125	0.491873	0.00749194	2550.92	34.26	2569.63	22.8881	2578.77	32.3731	101.092
14BB40-1-39	0.648244			0.135993	0.00198011	7.79698	0.112308	0.412595	0.00285322	2176.86	25.62	2207.86	12.9638	2226.77	13.0208	102.293
14BB40-1-40	0.573675			0.201409	0.0029266	15.4692	0.218088	0.55424	0.00435028	2838.89	23.7625	2844.59	13.4467	2842.78	18.0434	100.137
14BB40-1-41	0.882558			0.184203	0.00380151	14.3877	0.252965	0.563077	0.00811804	2691.05	34.26	2775.62	16.6938	2879.33	33.4806	106.997
14BB40-1-42	0.39114			0.167053	0.002554	11.0976	0.182338	0.480101	0.00532489	2528.09	25.925	2531.36	15.3053	2527.71	23.1921	99.985
14BB40-1-44	1.00386			0.166539	0.00368576	11.5208	0.257638	0.497818	0.00787304	2524.07	37.0375	2566.27	20.8963	2604.41	33.8849	103.183

## Sheet: 14BB41-1
	Ratio									Age
Analysis	Th/U	common 206Pb		207Pb/206Pb	207Pb/206Pb	207Pb/235U	207Pb/235U	206Pb/238U	206Pb/238U	207Pb/206Pb	207Pb/206Pb	207Pb/235U	207Pb/235U	206Pb/238U	206Pb/238U
		%	1sigma	Ratio	1sigma	Ratio	1sigma	Ratio	1sigma	Age (Ma)	1sigma	Age (Ma)	1sigma	Age (Ma)	1sigma	Concordance(%)
14BB41-1-01	0.425558			0.165961	0.00204181	10.9565	0.131525	0.477507	0.00376034	2517.59	20.3675	2519.45	11.1699	2516.4	16.4065	99.9527
14BB41-1-02	0.536307			0.319683	0.00348279	32.7127	0.36003	0.739326	0.0052455	3568.21	16.665	3571.99	10.844	3568.07	19.4413	99.9962
14BB41-1-03	0.449145			0.166155	0.00198486	10.979	0.131206	0.477979	0.00396526	2520.37	20.06	2521.35	11.1219	2518.46	17.2951	99.9241
14BB41-1-04	0.395445			0.168445	0.00229942	11.2454	0.148773	0.483585	0.00462075	2542.28	22.375	2543.69	12.3367	2542.86	20.078	100.023
14BB41-1-05	0.579549			0.288747	0.00280523	27.8207	0.278259	0.697419	0.00476735	3410.8	15.12	3412.8	9.80365	3410.86	18.1053	100.002
14BB41-1-06	0.467921			0.17024	0.00387575	12.0431	0.319405	0.510403	0.00774671	2561.11	38.2725	2607.77	24.8701	2658.35	33.0633	103.797
14BB41-1-07	1.11277			0.165069	0.00172624	10.8052	0.119972	0.47366	0.00334154	2509.26	17.59	2506.51	10.3193	2499.59	14.6173	99.6148
14BB41-1-08	1.39682			0.165066	0.00389235	10.3691	0.270455	0.455467	0.00745314	2509.26	39.5075	2468.29	24.1591	2419.51	33.011	96.4234
14BB41-1-09	0.886124			0.168049	0.00185867	11.1953	0.125537	0.48259	0.00314466	2538.58	18.5175	2539.52	10.4526	2538.54	13.6732	99.9982
14BB41-1-10	0.467253			0.218028	0.0026084	17.5499	0.219407	0.584444	0.00486582	2966.35	20.22	2965.39	12.0105	2966.85	19.797	100.017
14BB41-1-11	0.597802			0.167987	0.00172983	11.1794	0.118643	0.482689	0.00316822	2538.89	17.2825	2538.2	9.89138	2538.97	13.7748	100.003
14BB41-1-12	0.824897			0.165854	0.00157337	10.2319	0.0994471	0.447673	0.00292523	2516.36	14.97	2455.97	8.99043	2384.9	13.0259	94.7759
14BB41-1-13	0.802			0.165298	0.00187475	11.2745	0.120922	0.493837	0.00378273	2510.8	18.8275	2546.1	10.0034	2587.26	16.3238	103.045
14BB41-1-14	0.483634			0.315365	0.0026805	31.9926	0.29711	0.733686	0.00457209	3547.23	13.0925	3550.07	9.14415	3547.14	17.0006	99.9976
14BB41-1-15	0.242156			0.165557	0.00234394	11.1744	0.14949	0.488918	0.00548987	2513.27	18.36	2537.78	12.4686	2565.99	23.769	102.098
14BB41-1-16	0.495682			0.167684	0.00155683	11.4123	0.10743	0.492822	0.00285483	2534.87	14.9675	2557.43	8.78851	2582.87	12.3279	101.894
14BB41-1-17	0.956971			0.166697	0.00162228	11.0491	0.113277	0.479483	0.00324884	2524.99	16.665	2527.28	9.54619	2525.01	14.1559	100.001
14BB41-1-18	1.08652			0.214097	0.00355	15.4907	0.259744	0.522974	0.00518979	2936.72	27.62	2845.91	15.9946	2711.78	21.9673	92.3405
14BB41-1-19	0.836188			0.165842	0.00153027	10.9649	0.108386	0.47748	0.00295793	2516.36	14.97	2520.15	9.19831	2516.28	12.9058	99.9971
14BB41-1-20	0.74472			0.16636	0.00151878	11.0178	0.102778	0.478655	0.00298882	2521.3	15.43	2524.64	8.68391	2521.4	13.0302	100.004
14BB41-1-21	1.25765	0.92	0.21	0.15981	0.00331	10.2158	0.19359	0.46362	0.00384	2454	36	2455	18	2456	17	100.081
14BB41-1-22	0.341422			0.165729	0.0017496	10.7823	0.160408	0.469219	0.00580648	2516.66	17.1275	2504.54	13.8246	2480.14	25.4769	98.5485
14BB41-1-23	0.553414			0.167463	0.00172479	11.1621	0.119932	0.481351	0.00357215	2532.41	16.5125	2536.76	10.0131	2533.15	15.545	100.029
14BB41-1-24	0.709049			0.168572	0.00148812	11.2922	0.0984174	0.483786	0.00278127	2543.51	14.815	2547.56	8.12982	2543.74	12.0835	100.009
14BB41-1-25	0.459196			0.209325	0.00199884	16.4945	0.158526	0.568655	0.00341232	2901.85	15.435	2905.91	9.2011	2902.3	14.023	100.015
14BB41-1-26	0.885494			0.166636	0.00172433	11.0802	0.11476	0.479461	0.00275224	2524.38	18.055	2529.9	9.64628	2524.92	11.9923	100.021
14BB41-1-27	0.411047			0.189337	0.00212501	13.8416	0.150115	0.528938	0.00363251	2736.11	18.52	2738.93	10.2704	2736.97	15.3157	100.031
14BB41-1-28	0.557041			0.189127	0.00205003	13.9028	0.149303	0.530746	0.00407912	2734.88	18.675	2743.11	10.1729	2744.59	17.1784	100.355
14BB41-1-29	1.7053			0.167284	0.00161257	10.1791	0.0979905	0.439232	0.00302058	2530.55	16.05	2451.18	8.90059	2347.2	13.5294	92.7544
14BB41-1-30	0.428697			0.16552	0.00265752	10.9195	0.187937	0.476667	0.00662689	2512.65	26.3875	2516.3	16.0111	2512.73	28.93	100.003

## Sheet: 14BB44-1
	Ratio									Age
Analysis	Th/U	common 206Pb		207Pb/206Pb	207Pb/206Pb	207Pb/235U	207Pb/235U	206Pb/238U	206Pb/238U	207Pb/206Pb	207Pb/206Pb	207Pb/235U	207Pb/235U	206Pb/238U	206Pb/238U
		%	1sigma	Ratio	1sigma	Ratio	1sigma	Ratio	1sigma	Age (Ma)	1sigma	Age (Ma)	1sigma	Age (Ma)	1sigma	Concordance(%)
14BB44-1-01	0.822219			0.212628	0.00209261	16.8415	0.173699	0.574497	0.00483837	2925.61	16.0475	2925.85	9.88579	2926.26	19.8097	100.022
14BB44-1-02	0.663007			0.212231	0.0019283	16.8171	0.162281	0.573998	0.00380839	2924.07	14.8125	2924.47	9.24848	2924.21	15.5975	100.005
14BB44-1-03	0.562659			0.214395	0.00235929	17.0759	0.195646	0.577772	0.00521091	2939.19	17.5925	2939.11	10.9905	2939.66	21.2907	100.016
14BB44-1-04	0.513216			0.21201	0.00227068	16.7923	0.19772	0.573191	0.00466821	2920.68	17.285	2923.05	11.2841	2920.91	19.1288	100.008
14BB44-1-05	0.771521			0.213547	0.00211008	17.0075	0.170961	0.5763	0.00370008	2932.4	16.82	2935.26	9.64021	2933.64	15.1318	100.042
14BB44-1-06	0.887236			0.213184	0.00220607	16.9766	0.172699	0.575939	0.00342612	2931.48	16.665	2933.51	9.75499	2932.16	14.0146	100.023
14BB44-1-07	0.593412			0.212548	0.00221064	16.873	0.179022	0.574205	0.00357766	2924.99	16.2025	2927.65	10.1708	2925.06	14.6506	100.002
14BB44-1-08	0.538118			0.213836	0.00243805	17.0259	0.198434	0.576515	0.0042345	2934.87	18.5175	2936.29	11.178	2934.52	17.315	99.988
14BB44-1-09	1.05089			0.213246	0.0029198	17.3883	0.317827	0.587946	0.00714119	2931.48	22.22	2956.51	17.5518	2981.09	28.9905	101.692
14BB44-1-10	0.735105			0.211503	0.00222808	16.7423	0.178006	0.572268	0.00423954	2916.97	50.155	2920.19	10.1876	2917.13	17.3825	100.005
14BB44-1-11	0.592778			0.214273	0.0024959	17.0834	0.205736	0.577363	0.00559488	2937.96	18.3625	2939.53	11.5526	2937.98	22.8654	100.001
14BB44-1-12	0.501758			0.21268	0.00412274	16.8641	0.321095	0.574508	0.0068024	2927.78	31.48	2927.14	18.2528	2926.3	27.8508	99.9498
14BB44-1-13	0.805657			0.21124	0.00356963	17.384	0.295533	0.595017	0.0069148	2916.66	27.4675	2956.27	16.3242	3009.73	27.947	103.191
14BB44-1-14	0.881939			0.215188	0.00197014	17.2642	0.165796	0.579478	0.00378829	2946.29	14.815	2949.63	9.21755	2946.62	15.4614	100.011
14BB44-1-15	1.12899			0.211789	0.00195692	16.7938	0.153169	0.57311	0.00343466	2920.37	14.35	2923.13	8.74066	2920.58	14.0749	100.007
14BB44-1-16	0.672169			0.212335	0.00208081	16.9121	0.165047	0.575838	0.00339632	2923.76	14.965	2929.86	9.35631	2931.75	13.8936	100.273
14BB44-1-17	0.746107			0.213069	0.00247376	16.9296	0.196651	0.575284	0.00495376	2929.32	18.8225	2930.85	11.1371	2929.48	20.272	100.006
14BB44-1-18	0.740941			0.210449	0.00217062	15.6102	0.169933	0.536553	0.00524495	2908.95	16.665	2853.24	10.3884	2769	22.0046	95.1891
14BB44-1-19	0.943678			0.210647	0.00176611	16.3442	0.1475	0.560819	0.00369309	2910.8	12.805	2897.15	8.63533	2870.01	15.253	98.5987
14BB44-1-20	1.74368			0.211762	0.00187739	16.804	0.153058	0.573174	0.00322969	2920.37	47.685	2923.72	8.72928	2920.84	13.2344	100.016
14BB44-1-21	0.506721			0.214241	0.00221893	17.1251	0.191781	0.577192	0.00442588	2937.96	16.665	2941.87	10.7442	2937.28	18.0898	99.977
14BB44-1-22	0.721936			0.214893	0.00210156	17.1684	0.180089	0.578242	0.00503062	2942.9	15.74	2944.29	10.065	2941.57	20.5479	99.9549
14BB44-1-23	0.689293			0.21409	0.00210521	17.572	0.172581	0.593289	0.00362538	2936.72	16.51	2966.6	9.43576	3002.74	14.6682	102.248
14BB44-1-24	0.710633			0.211355	0.00224476	16.705	0.181019	0.571771	0.00424052	2915.74	17.28	2918.06	10.3818	2915.09	17.392	99.9776
14BB44-1-25	0.980328			0.210985	0.00232469	15.7948	0.180269	0.541406	0.00445083	2913.27	17.5925	2864.47	10.8991	2789.33	18.6142	95.7457
14BB44-1-26	0.731109			0.211244	0.00283618	15.6909	0.212605	0.537811	0.00571406	2916.66	21.1375	2858.17	12.9344	2774.28	23.9531	95.1182
14BB44-1-27	0.650306			0.213315	0.00196084	16.9824	0.169996	0.575679	0.00391453	2931.17	15.12	2933.84	9.59919	2931.09	16.0152	99.9974
14BB44-1-28	0.58094			0.214179	0.00233761	17.0747	0.190331	0.577341	0.00507311	2938.89	17.8975	2939.04	10.6927	2937.89	20.7333	99.9662
14BB44-1-29	0.784104			0.213837	0.00300533	16.8589	0.259856	0.570346	0.0058958	2934.87	22.53	2926.84	14.7754	2909.24	24.2029	99.1267
14BB44-1-30	0.556011			0.215408	0.00225206	16.7257	0.184901	0.561656	0.00447004	2946.6	16.665	2919.24	10.5921	2873.47	18.4521	97.5181

## Sheet: 14BB47-1 igneous cores
	Ratio									Age
Analysis	Th/U	common 206Pb		207Pb/206Pb	207Pb/206Pb	207Pb/235U	207Pb/235U	206Pb/238U	206Pb/238U	207Pb/206Pb	207Pb/206Pb	207Pb/235U	207Pb/235U	206Pb/238U	206Pb/238U
		%	1sigma	Ratio	1sigma	Ratio	1sigma	Ratio	1sigma	Age (Ma)	1sigma	Age (Ma)	1sigma	Age (Ma)	1sigma	Concordance(%)
14BB47-1-01	0.507831			0.164712	0.00219325	10.9593	0.150156	0.480206	0.00406146	2505.55	22.2225	2519.68	12.8633	2528.16	17.7406	100.902
14BB47-1-05	0.783392			0.165247	0.00176553	10.8501	0.115389	0.474689	0.00279126	2510.18	17.9025	2510.37	10.0334	2504.09	12.2763	99.7572
14BB47-1-07	0.724773			0.166348	0.00229283	10.9984	0.150084	0.478372	0.00371448	2521.3	23.145	2522.99	12.8165	2520.17	16.254	99.9555
14BB47-1-09	0.735676			0.168804	0.00263619	11.471	0.177774	0.491573	0.00477347	2545.98	25.7725	2562.22	14.5788	2577.48	20.6773	101.237
14BB47-1-10	0.502786			0.168436	0.00176621	11.259	0.122408	0.483222	0.00307075	2542.28	18.365	2544.81	10.2854	2541.28	13.4165	99.9608
14BB47-1-12	0.888281			0.167746	0.00221749	11.0348	0.154457	0.47551	0.00444957	2535.49	22.225	2526.07	13.1443	2507.68	19.487	98.9032
14BB47-1-13	0.672853			0.169553	0.00175071	11.3857	0.125463	0.486001	0.00341406	2553.39	18.06	2555.25	10.4313	2553.35	14.8746	99.9984
14BB47-1-14	0.725499			0.166464	0.00181726	11.0166	0.121442	0.478934	0.00321778	2524.07	17.4375	2524.54	10.4043	2522.62	14.0917	99.9425
14BB47-1-15	0.706321			0.169189	0.00232155	11.2263	0.157384	0.480393	0.0042851	2549.69	22.3775	2542.1	13.1844	2528.98	18.7095	99.1877
14BB47-1-17	0.555452			0.169908	0.0021604	11.4864	0.14641	0.490094	0.00388021	2556.48	26.7	2563.48	12.0329	2571.08	16.8438	100.571
14BB47-1-18	0.839308			0.169648	0.00194981	11.3302	0.128309	0.482985	0.00295312	2554.01	19.14	2550.69	10.7076	2540.25	12.9101	99.4613
14BB47-1-19	0.704698			0.167409	0.00185291	11.1388	0.126393	0.480902	0.00300302	2531.79	18.5175	2534.81	10.7121	2531.19	13.1435	99.9765
14BB47-1-20	0.800982			0.167943	0.00165084	11.1915	0.112969	0.482158	0.00277614	2538.89	16.355	2539.21	9.56592	2536.66	12.1518	99.9122
14BB47-1-21	0.586959			0.167268	0.0017378	11.1038	0.115372	0.480771	0.00289362	2531.48	17.59	2531.88	9.83049	2530.62	12.671	99.9661
14BB47-1-22	0.417155			0.165296	0.00178328	10.8761	0.113573	0.476243	0.00325564	2510.8	18.21	2512.59	9.85948	2510.88	14.2811	100.003
14BB47-1-25	1.32068			0.165875	0.00424359	10.246	0.305196	0.446053	0.00937963	2516.36	43.2125	2457.24	27.6062	2377.68	41.8335	94.4891
14BB47-1-26	0.740263			0.164438	0.00753691	10.2069	0.506068	0.448417	0.0105909	2501.54	71.7625	2453.7	45.8818	2388.21	47.1542	95.4696
14BB47-1-27	0.718045			0.165146	0.00167296	10.8721	0.112942	0.476018	0.00316295	2508.95	18.055	2512.25	9.80947	2509.9	13.8803	100.038
14BB47-1-28	0.764529			0.165658	0.00168268	10.9475	0.109309	0.478032	0.00286269	2514.5	16.51	2518.68	9.44644	2518.69	12.5594	100.167
14BB47-1-30	0.980269			0.164642	0.00159021	10.8307	0.104039	0.475509	0.00255797	2505.55	16.3575	2508.71	9.09071	2507.68	11.2574	100.085
14BB47-1-31	0.794627			0.165321	0.00209765	10.8358	0.148378	0.473892	0.00475949	2510.8	15.895	2509.14	12.843	2500.61	20.8605	99.594
14BB47-1-32	0.934559			0.164709	0.00577557	10.5609	0.201218	0.466449	0.016845	2505.55	59.26	2485.28	17.7534	2467.97	74.0617	98.4999
14BB47-1-33	0.512599			0.165331	0.00231735	10.7395	0.157062	0.469597	0.00461989	2510.8	56.3275	2500.84	13.6908	2481.79	20.3095	98.8447
14BB47-1-34	0.748934			0.164952	0.00327576	10.3748	0.210165	0.454093	0.0072478	2507.1	33.335	2468.81	18.8355	2413.42	32.158	96.2635
14BB47-1-35	0.58543			0.16501	0.00167686	10.7495	0.109956	0.470345	0.00267691	2509.26	16.975	2501.71	9.6534	2485.07	11.8128	99.0362
14BB47-1-36	0.623767			0.164647	0.0016469	10.8511	0.104437	0.476121	0.00280571	2505.55	16.975	2510.45	9.10936	2510.35	12.3277	100.191
14BB47-1-37	0.609387			0.165777	0.00173097	10.9317	0.113038	0.476264	0.00302616	2516.66	17.59	2517.33	9.77062	2510.97	13.2837	99.7738

## Sheet: 14BB47-1 metamorphic rims
	Ratio									Age
Analysis	Th/U	common 206Pb		207Pb/206Pb	207Pb/206Pb	207Pb/235U	207Pb/235U	206Pb/238U	206Pb/238U	207Pb/206Pb	207Pb/206Pb	207Pb/235U	207Pb/235U	206Pb/238U	206Pb/238U
		%	1sigma	Ratio	1sigma	Ratio	1sigma	Ratio	1sigma	Age (Ma)	1sigma	Age (Ma)	1sigma	Age (Ma)	1sigma	Concordance(%)
14BB47-1-11	0.650638			0.166236	0.00264584	10.9893	0.178772	0.478777	0.00512053	2520.06	26.0775	2522.23	15.2371	2521.93	22.3634	100.074
14BB47-1-16	0.598084			0.16436	0.00232324	10.7951	0.149077	0.475655	0.00399145	2501.85	23.7675	2505.65	12.9459	2508.31	17.4892	100.258
14BB47-1-23	0.761624			0.165628	0.00168237	10.926	0.115623	0.477007	0.00291578	2513.89	16.51	2516.85	9.99179	2514.21	12.7982	100.013
14BB47-1-24	0.633639			0.16358	0.00207146	10.5967	0.137779	0.467907	0.00346189	2494.45	21.2975	2488.42	12.1818	2474.38	15.2617	99.1954
14BB47-1-38	0.783845			0.164445	0.00222812	11.2198	0.15457	0.492158	0.00383342	2502.16	22.84	2541.56	12.9595	2580	16.6196	103.111
14BB47-1-39	0.994287			0.165115	0.00190603	10.8803	0.12124	0.475809	0.00291383	2508.95	14.0425	2512.95	10.5021	2508.99	12.7997	100.001
14BB47-1-40	0.696793			0.163616	0.00229633	10.6975	0.144571	0.472565	0.00395293	2494.45	23.7675	2497.21	12.6636	2494.8	17.357	100.014
14BB47-1-41	0.750297			0.165808	0.00244102	10.9708	0.164751	0.477976	0.00498093	2516.66	24.69	2520.66	14.0791	2518.45	21.7676	100.071
14BB47-1-42	0.556055			0.166446	0.00205331	11.0377	0.133222	0.479022	0.00364103	2524.07	20.68	2526.31	11.3679	2523	15.928	99.9578
14BB47-1-43	0.781844			0.165095	0.00223797	11.0374	0.146561	0.48318	0.00420531	2508.34	22.0675	2526.3	12.4815	2541.1	18.3292	101.306
14BB47-1-44	0.603065			0.165963	0.00170083	10.9908	0.111988	0.478028	0.00282844	2517.59	16.2025	2522.35	9.63701	2518.67	12.411	100.043
14BB47-1-45	0.967141			0.1659	0.00183611	10.8771	0.120657	0.473289	0.00314416	2516.97	18.515	2512.68	10.4556	2497.97	13.8233	99.245
14BB47-1-46	0.949037			0.164036	0.00168161	10.7681	0.11773	0.473375	0.00319084	2497.84	18.0575	2503.32	10.2997	2498.34	14.0258	100.02
14BB47-1-47	0.0204178			0.164103	0.00258457	10.4242	0.152174	0.460603	0.00507897	2498.46	26.235	2473.2	13.6295	2442.22	22.4549	97.749
14BB47-1-48	0.750226			0.164548	0.00210022	10.8106	0.136513	0.474625	0.00358414	2502.78	21.605	2506.97	11.8596	2503.81	15.7265	100.041
14BB47-1-49	0.710367			0.164903	0.00270755	10.7388	0.17171	0.470661	0.00493012	2506.48	60.1875	2500.78	14.9497	2486.46	21.6521	99.2012
14BB47-1-50	0.702691			0.162926	0.00245331	10.6468	0.16692	0.47124	0.00494601	2486.11	30.7125	2492.79	14.6508	2489	21.7132	100.116
14BB47-1-51	0.610094			0.163682	0.00301129	9.95692	0.192881	0.438478	0.00533018	2494.14	31.1725	2430.8	17.9507	2343.82	23.9202	93.9733
14BB47-1-52	0.338044			0.165556	0.00293409	11.0641	0.223883	0.482838	0.0076734	2513.27	29.94	2528.54	18.9216	2539.62	33.3871	101.048
14BB47-1-53	0.703159			0.164773	0.00269469	10.8408	0.173504	0.474931	0.00476811	2505.24	27.4725	2509.57	14.976	2505.15	20.8836	99.9962
14BB47-1-54	0.723322			0.165933	0.0034457	10.9938	0.234169	0.476942	0.00526699	2516.97	34.105	2522.61	19.8986	2513.93	23.0289	99.8793
14BB47-1-56	1.3383			0.165749	0.00370413	10.7989	0.234813	0.469473	0.00517823	2516.66	38.4275	2505.97	20.2792	2481.25	22.7558	98.5927

## Sheet: 14BB49-1 igneous cores
	Ratio									Age
Analysis	Th/U	common 206Pb		207Pb/206Pb	207Pb/206Pb	207Pb/235U	207Pb/235U	206Pb/238U	206Pb/238U	207Pb/206Pb	207Pb/206Pb	207Pb/235U	207Pb/235U	206Pb/238U	206Pb/238U
		%	1sigma	Ratio	1sigma	Ratio	1sigma	Ratio	1sigma	Age (Ma)	1sigma	Age (Ma)	1sigma	Age (Ma)	1sigma	Concordance(%)
14BB49-1-01	0.276589			0.166734	0.00284622	11.0771	0.192114	0.479447	0.00584458	2524.99	28.7	2529.64	16.2433	2524.86	25.5031	99.9945
14BB49-1-02	0.929883			0.166668	0.00351688	10.9304	0.225362	0.473149	0.00548782	2524.38	36.265	2517.22	19.2566	2497.36	24.0522	98.9295
14BB49-1-03	0.408945			0.16606	0.00251765	10.9364	0.159175	0.475371	0.00409119	2518.21	24.535	2517.74	13.6481	2507.07	17.927	99.5578
14BB49-1-05	0.0674959			0.164679	0.00228912	10.4561	0.15036	0.457485	0.00481148	2505.55	23.46	2476.04	13.4327	2428.45	21.3214	96.9225
14BB49-1-06	0.224614			0.165348	0.00192796	10.9155	0.127308	0.476122	0.0030425	2510.8	20.215	2515.96	10.9826	2510.35	13.356	99.9821
14BB49-1-09	0.61775			0.166971	0.00338949	11.0601	0.210566	0.480126	0.0060813	2527.47	33.4875	2528.2	17.8115	2527.82	26.5211	100.014
14BB49-1-12	0.315151			0.164753	0.00282124	10.6428	0.172361	0.464934	0.00485614	2505.24	61.885	2492.45	15.127	2461.31	21.4107	98.2461
14BB49-1-13	0.918114			0.165238	0.00381877	10.8434	0.215334	0.475948	0.00720604	2510.18	38.89	2509.79	18.5402	2509.59	31.5026	99.9764
14BB49-1-16	0.649982			0.165607	0.00502992	11.0146	0.393266	0.477359	0.0103672	2513.89	51.39	2524.36	33.2803	2515.75	45.2573	100.074
14BB49-1-17	0.509777			0.164449	0.00248899	10.8114	0.157222	0.472777	0.00320534	2502.16	25.62	2507.05	13.6229	2495.73	14.0945	99.7429
14BB49-1-22	0.805634			0.166457	0.0021687	11.1603	0.152376	0.483361	0.00429091	2524.07	21.14	2536.61	12.8397	2541.89	18.698	100.706
14BB49-1-24	0.668409			0.164625	0.00233933	10.8168	0.164514	0.474649	0.00408102	2505.55	24.0775	2507.51	14.2387	2503.92	17.8913	99.9346
14BB49-1-25	0.051759			0.165488	0.00187697	10.9528	0.150965	0.476486	0.00356453	2512.65	18.3625	2519.13	12.9382	2511.94	15.6219	99.9718
14BB49-1-26	0.405478			0.168294	0.00168045	11.2629	0.116867	0.483074	0.00351719	2542.59	16.67	2545.14	9.8303	2540.64	15.3495	99.9233
14BB49-1-27	0.31419			0.167876	0.00163226	11.1999	0.115185	0.482106	0.00340458	2536.72	16.82	2539.9	9.7411	2536.43	14.8714	99.9887
14BB49-1-29	0.905458			0.167995	0.00259191	11.1612	0.166259	0.482465	0.00420407	2538.89	21.295	2536.68	13.9884	2537.99	18.3325	99.9648
14BB49-1-30	0.224729			0.164922	0.00278407	10.4228	0.181048	0.456352	0.00566782	2506.48	27.6225	2473.08	16.1812	2423.43	25.1222	96.6866
14BB49-1-31	0.486291			0.165845	0.00182551	10.9621	0.119145	0.477362	0.00295706	2516.36	18.515	2519.92	10.2575	2515.77	12.9743	99.9766
14BB49-1-32	0.700678			0.165956	0.00285045	11.067	0.186068	0.481582	0.00728868	2516.97	29.01	2528.79	15.7509	2534.15	31.7428	100.683
14BB49-1-33	0.704141			0.164622	0.00366915	10.4652	0.183379	0.458719	0.00899703	2503.39	37.3475	2476.84	16.3276	2433.9	39.7817	97.2241
14BB49-1-37	0.496816			0.165066	0.00204832	10.8344	0.134905	0.474145	0.00404094	2509.26	20.6775	2509.02	11.6998	2501.71	17.7225	99.6993
14BB49-1-38	0.508983			0.167075	0.00268371	11.0411	0.173369	0.479952	0.00421841	2528.7	26.85	2526.6	14.7202	2527.05	18.4253	99.9349
14BB49-1-39	0.951429	0.45	0.16	0.16306	0.00361	10.1254	0.19395	0.45035	0.00498	2488	38	2446	18	2397	22	96.3424
14BB49-1-41	0.362114			0.166723	0.00587226	11.0136	0.31784	0.480133	0.0107666	2524.99	59.265	2524.28	26.9184	2527.84	46.9116	100.113
14BB49-1-44	0.505849			0.164324	0.00283125	11.2181	0.261649	0.49206	0.0104748	2501.85	28.5525	2541.42	21.8129	2579.58	45.2776	103.107
14BB49-1-47	0.345785			0.166785	0.00382024	11.0857	0.24206	0.47974	0.00575303	2525.61	39.04	2530.36	20.4094	2526.14	25.0999	100.021
14BB49-1-48	0.487338			0.164502	0.00292852	10.7527	0.187098	0.470482	0.0049281	2502.16	30.2475	2501.99	16.2537	2485.68	21.6458	99.3412
14BB49-1-51	0.556342			0.166451	0.00285284	11.5213	0.209527	0.498816	0.00714207	2524.07	28.2375	2566.31	17.0805	2608.71	30.7503	103.353
14BB49-1-52	0.53364			0.170292	0.00276546	11.5208	0.181549	0.488869	0.0058978	2560.8	27.165	2566.27	14.8259	2565.78	25.5735	100.194
14BB49-1-53	0.966507			0.165534	0.00226118	10.9399	0.146674	0.476905	0.00352057	2513.27	17.745	2518.03	12.5903	2513.77	15.4265	100.02
14BB49-1-54	0.196569			0.165072	0.00335977	11.3322	0.256829	0.494872	0.00732708	2509.26	34.26	2550.86	21.2172	2591.72	31.6279	103.286
14BB49-1-55	0.0409885			0.166082	0.00639177	11.3165	0.442486	0.492408	0.012912	2520.37	64.8175	2549.57	36.52	2581.09	55.7906	102.409
14BB49-1-56	0.490471			0.1687	0.00240069	11.3702	0.165431	0.485718	0.00391393	2546.29	23.765	2553.98	13.6897	2552.12	17.0381	100.229
14BB49-1-57	0.216199			0.17031	0.0022558	11.7438	0.158529	0.4965	0.00394892	2560.8	21.915	2584.2	12.7526	2598.74	17.0684	101.482
14BB49-1-58	0.208346			0.166851	0.00337527	11.4287	0.281172	0.494126	0.0100463	2527.78	34.7225	2558.78	23.0365	2588.5	43.3674	102.402

## Sheet: 14BB49-1 metamorphic rims
	Ratio									Age
Analysis	Th/U	common 206Pb		207Pb/206Pb	207Pb/206Pb	207Pb/235U	207Pb/235U	206Pb/238U	206Pb/238U	207Pb/206Pb	207Pb/206Pb	207Pb/235U	207Pb/235U	206Pb/238U	206Pb/238U
		%	1sigma	Ratio	1sigma	Ratio	1sigma	Ratio	1sigma	Age (Ma)	1sigma	Age (Ma)	1sigma	Age (Ma)	1sigma	Concordance(%)
14BB49-1-04	0.776453			0.164795	0.00361127	10.1273	0.206564	0.445228	0.00671616	2505.24	36.7325	2446.47	18.9225	2374	29.9847	94.7613
14BB49-1-07	0.236589			0.162606	0.00222979	10.539	0.144347	0.467864	0.00342144	2483.02	22.3775	2483.35	12.8137	2474.19	15.0852	99.6442
14BB49-1-08	0.344988			0.165754	0.00297109	10.8007	0.213882	0.469471	0.00653059	2516.66	30.71	2506.13	18.482	2481.24	28.6803	98.5924
14BB49-1-10	0.257418			0.162029	0.00227313	10.4459	0.15241	0.465035	0.00488839	2476.84	24.5375	2475.13	13.6248	2461.75	21.5508	99.3907
14BB49-1-11	0.707647			0.163776	0.00220503	10.7291	0.145079	0.472729	0.0035851	2494.76	22.84	2499.95	12.6739	2495.52	15.7504	100.031
14BB49-1-14	0.277937			0.162955	0.00235733	10.6515	0.154888	0.470616	0.00385845	2486.73	24.385	2493.21	13.6039	2486.26	16.9666	99.9812
14BB49-1-15	0.753636			0.164044	0.00321623	10.7753	0.206073	0.473543	0.00525334	2497.84	33.49	2503.94	17.8511	2499.08	23.0218	100.05
14BB49-1-18	0.707548			0.162954	0.00257629	10.6171	0.165016	0.470579	0.00389585	2486.73	25.7725	2490.21	14.5221	2486.1	17.1305	99.9746
14BB49-1-19	0.751963			0.163625	0.00242231	10.7144	0.15604	0.472586	0.00362771	2494.45	25.005	2498.68	13.6315	2494.89	15.9378	100.018
14BB49-1-23	0.12423			0.163078	0.00277917	10.5574	0.169818	0.46699	0.00443278	2487.96	28.7075	2484.97	15.0149	2470.35	19.5246	99.2921
14BB49-1-28	0.750948			0.162232	0.0021039	11.0784	0.162207	0.493559	0.00474733	2479.32	22.38	2529.75	13.7441	2586.06	20.5377	104.305
14BB49-1-34	0.483862			0.162672	0.00211477	10.5724	0.138073	0.470152	0.00338627	2483.64	21.9175	2486.29	12.2321	2484.23	14.9088	100.024
14BB49-1-35	0.884561			0.164199	0.00203172	10.7569	0.131214	0.47368	0.00311488	2499.07	20.2175	2502.35	11.4593	2499.68	13.6923	100.024
14BB49-1-36	0.604178			0.162122	0.00265471	10.4924	0.177077	0.468608	0.00566728	2479.62	27.47	2479.24	15.7358	2477.45	24.9123	99.9124
14BB49-1-40	0.555866			0.162309	0.00277963	10.5081	0.175094	0.469336	0.00430676	2479.93	28.7075	2480.63	15.5408	2480.65	18.9425	100.029
14BB49-1-42	0.640705			0.16212	0.0030209	10.4883	0.19212	0.469207	0.00471493	2479.62	31.485	2478.89	17.0638	2480.08	20.7309	100.019
14BB49-1-43	0.786473			0.164462	0.00233447	10.7793	0.148422	0.473885	0.00364876	2502.16	22.9925	2504.28	12.9069	2500.58	16.0158	99.9367
14BB49-1-45	1.07017			0.164416	0.00277583	10.8071	0.171279	0.473325	0.00447807	2501.54	29.17	2506.68	14.8278	2498.13	19.6398	99.8635
14BB49-1-46	0.616915			0.162253	0.00320805	10.6727	0.206176	0.478039	0.0058431	2479.32	33.335	2495.05	18.0148	2518.72	25.5207	101.589
14BB49-1-49	0.79814			0.162131	0.00287882	10.6502	0.183871	0.47553	0.00557001	2479.62	30.715	2493.09	16.1149	2507.77	24.3724	101.135
14BB49-1-50	0.84398			0.164899	0.00439844	11.1247	0.30444	0.488569	0.00847737	2506.48	45.0625	2533.63	25.5535	2564.48	36.7383	102.314
